# Supplementary material
Source: Royal Society of Chemistry journal article supplement (doi:10.1039/d6sm00148c)
Supplement: d6sm00148c2.pdf [file d6sm00148c2.pdf]

## How tip geometry controls fracture in ductile polymer glasses and brittle elastomers

Asal Y Siavoshani, Zehao Fan, and Shi-Qing Wang\*

School of Polymer Science and Polymer Engineering, University of Akron, Akron, Ohio 44325

Supporting Information (SI) provides supplementary experimental details and characterization data that complement the findings presented in the main manuscript. Specifically, it includes representative stress-strain (SS) curve for the uncut polystyrene (PS) specimen till fracture, as shown Figure SI.1. Additionally, the SI details the methodology for determining the energy release rate  $G$  at fracture for the butadiene rubber (BR) system, including the experimental parameters employed for both uniaxial tension tests and pure-shear fracture tests, along with representative SS curves for the uncut BR specimens. Movie SI.1 presents a visual record of dynamic crack propagation in the BR1phr elastomer, enabling direct observation of crack growth at various load levels.

**Movie SI.1** : BR1phr with pure shear geometry in uniaxial stretching tests using a crosshead speed of  $V=10$  mm/min.

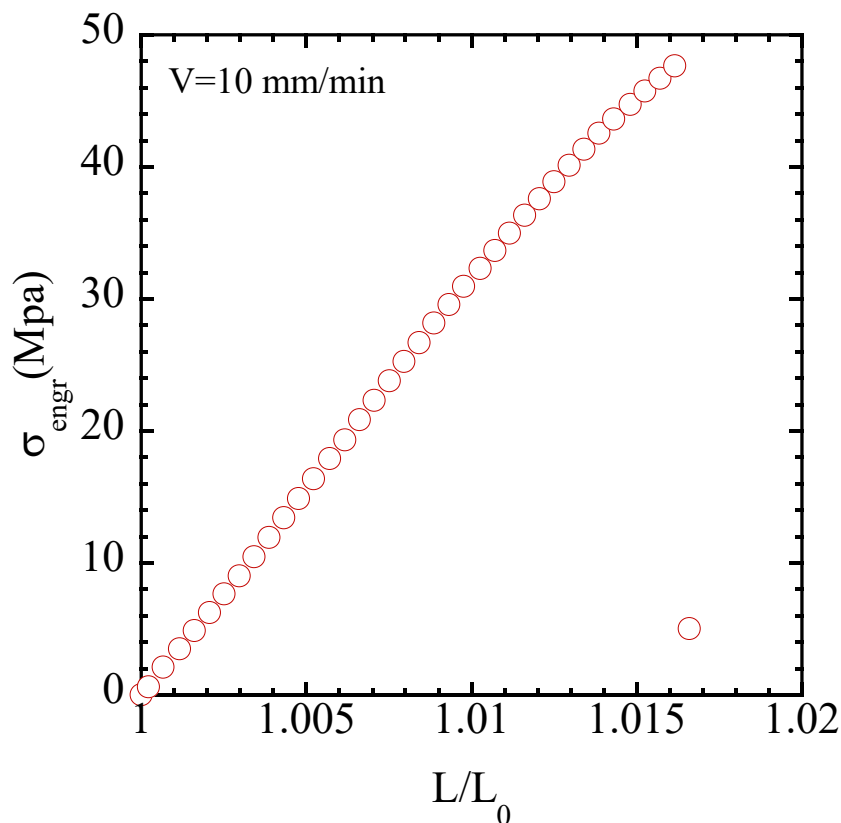

**Figure SI.1** Stress-strain (SS) curve for the uncut polystyrene (PS) specimen using dumbbell shape geometry (gauge length  $L_0 = 27$  mm,  $B = 1.0$  mm,  $W = 3.33$  mm) obtained from a uniaxial tensile test at a crosshead speed of  $V=10$  mm  $\text{min}^{-1}$ .

\* Corresponding author's email: swang@uakron.edu.

To determine  $G$  for the BR system, we first tested uncut specimens in tension test with an initial gauge length  $L_0 = 17$  mm at a crosshead speed of  $V = 10$  mm/min. We then performed pure-shear fracture tests using specimens with initial height  $h_0 = 10$  mm and width  $W = 70$  mm. The specimen thickness was  $B = 1.5$  mm for both tests.

Reading stretch ratio at the stress maximum shown by squares in Figure SI.2, i.e., at  $\lambda = 1.11$ , the strain energy density  $W$  was calculated as the area under the uncut stress–stretch curve up to 1.11. The area under the circles up to 1.11 from Figure SI.2 is found to be  $W = 0.021$  J/m<sup>3</sup>. Using Rivlin-Thomas formula  $G = Wh_0$ , we obtain  $G = 0.21$  kJ/m<sup>2</sup> with ( $h_0 = 10$  mm).

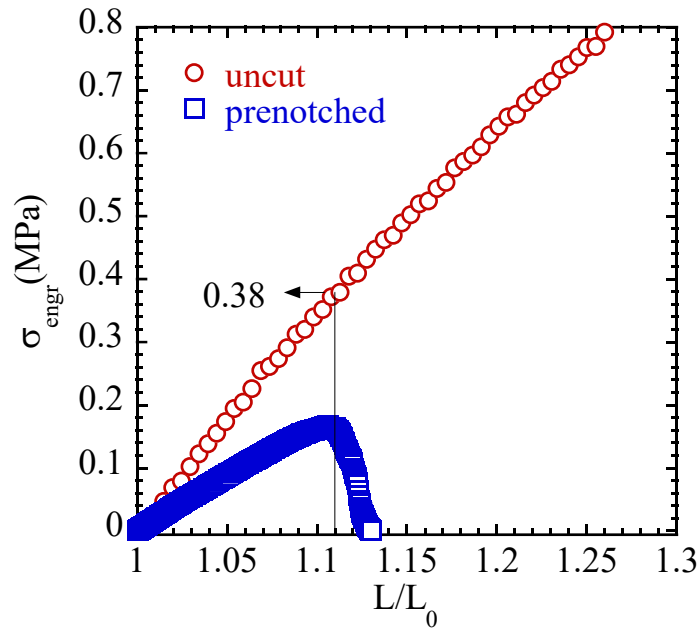

**Figure SI2** Representative stress–strain response of the uncut BR specimen tested at  $V = 50$  mm/min with  $L_0 = 17$  mm  $W=1.3$  mm and  $B = 1.5$  mm. The strain energy density  $W$  is obtained by integrating the area under the curve (circles) up to the stretch ratio of 1.11 at the stress maximum.
